# Supplementary material for: White Matter Microstructural Differences between Hallucinating and Non-Hallucinating Schizophrenia Spectrum Patients
Source: PubMed Central journal article supplement (PMC7832406; doi:10.3390/diagnostics11010139), 2021-01-19
Supplement: diagnostics-11-00139-s001.pdf [file diagnostics-11-00139-s001.pdf]

## Supplementary materials

Mean FA skeleton mask AVH+ vs AVH- patients

Mean FA skeleton mask AVH- vs Ctrl

Mean FA skeleton mask AVH+ vs Ctrl

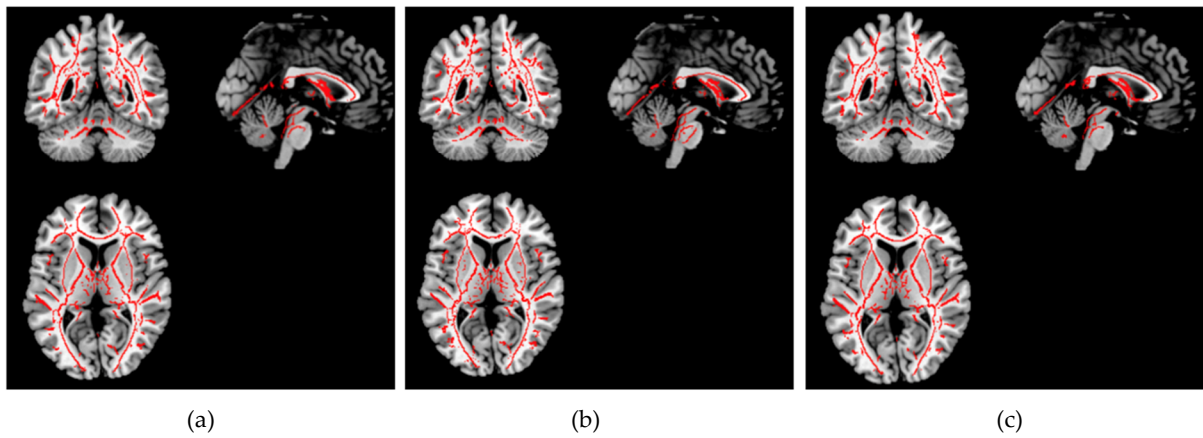

**Figure S1.** Mean FA skeleton masks derived for three comparisons: a) hallucinating schizophrenia patients (AVH+) vs. non-hallucinating patients (AVH-); b) non-hallucinating schizophrenia patients vs. matched healthy controls; c) hallucinating schizophrenia patients vs. matched healthy controls.

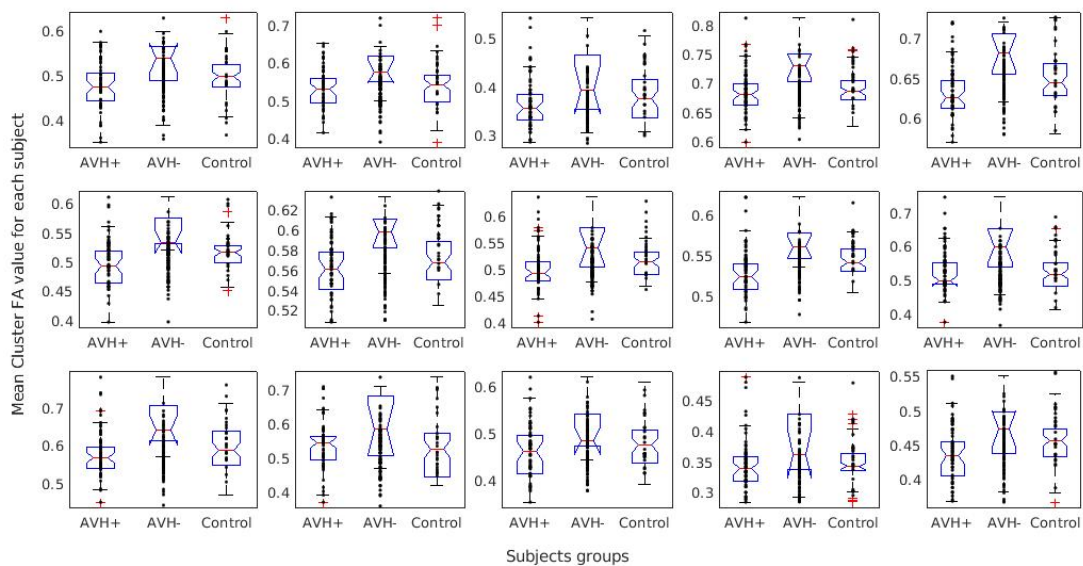

**Figure S2.** The box plot graphs showing the mean clusters FA values for each participant in each group (AVH+, AVH-, Control). The central mark indicates the median, and the top and bottom edges of the box represent the 25<sup>th</sup> and 75<sup>th</sup> percentiles, respectively. The whiskers extend to the most extreme data points not considered outliers, while the outliers are plotted individually and marked with a plus symbol. NB. Data were merged for the two control groups and presented as a single control group for facilitation of comparison with the patient groups.
